# Supplementary material for: Automated Delineation of Supraglacial Debris Cover Using Deep Learning and Multisource Remote Sensing Data
Source: MDPI journal article supplement (doi:10.3390/rs14061352), 2022-03-10
Supplement: s1 [file s1]

# Automated Delineation of Supraglacial Debris Cover Using Deep Learning and Multisource Remote Sensing Data

Saurabh Kaushik <sup>1,2,3,\*</sup>, Tejpal Singh<sup>1,2</sup>, Anshuman Bhardwaj <sup>4</sup>, P. K. Joshi <sup>5,6</sup> and Andreas J. Dietz <sup>3</sup>

<sup>1</sup> Academy of Scientific and Innovative Research (AcSIR), Ghaziabad 201 002, India

<sup>2</sup> CSIR-Central Scientific Instrument Organisation, Chandigarh 160 030, India

<sup>3</sup> German Remote Sensing Data Center (DFD), German Aerospace Center (DLR), Muenchener Str. 20, 82234 Wessling, Germany

<sup>4</sup> School of Geosciences, University of Aberdeen, Meston Building, King's College, Aberdeen AB24 3UE, United Kingdom

<sup>5</sup> School of Environmental Sciences, Jawaharlal Nehru University, New Delhi 110 067, India

<sup>6</sup> Special Centre for Disaster Research, Jawaharlal Nehru University, New Delhi 110 067, India

\* Correspondence: saurabh21.kaushik@gmail.com, saurabh.kaushik@dlr.de

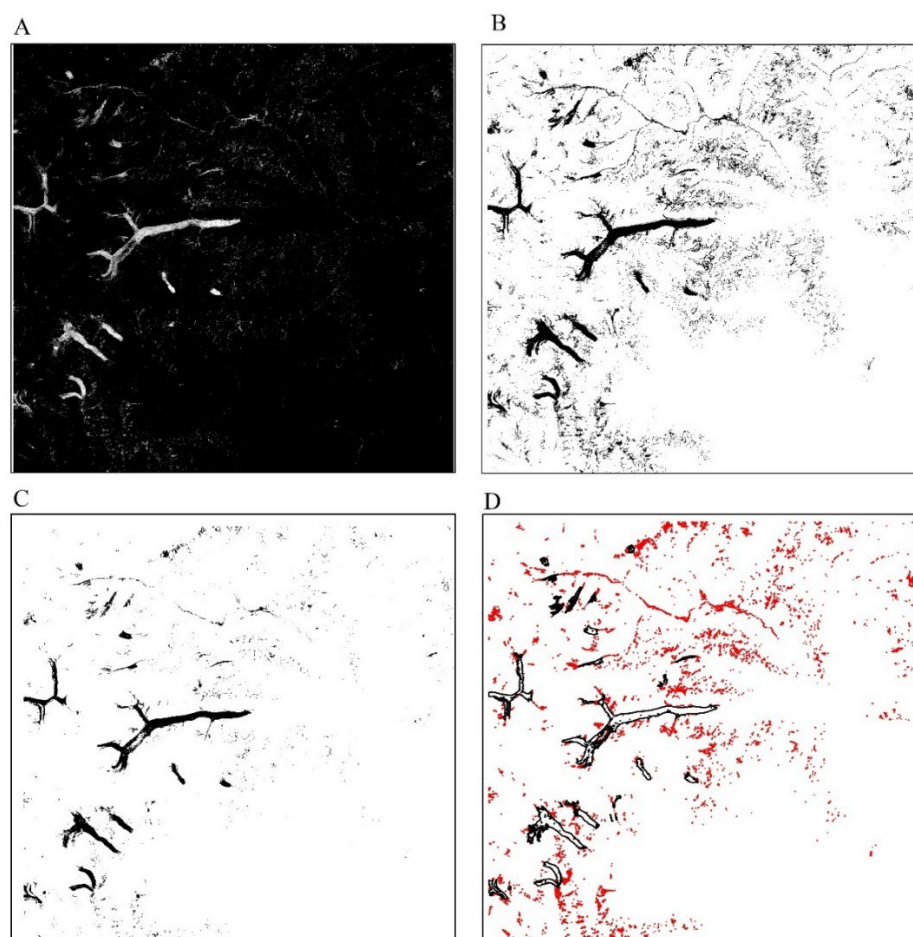

**Figure S1.** Illustration of the algorithm workflow and post-processing steps. (A) – results obtained via the proposed deep neural network (SGDNet), (B) – results obtained via the first post-processing step (if *DNN result* > 0.3 and *elevation* > 3300), (C) – cleaning up of the result using a 5×5 median filter, and (D) – the results after vectorization, the red polygons (<0.02) are removed from the final results.

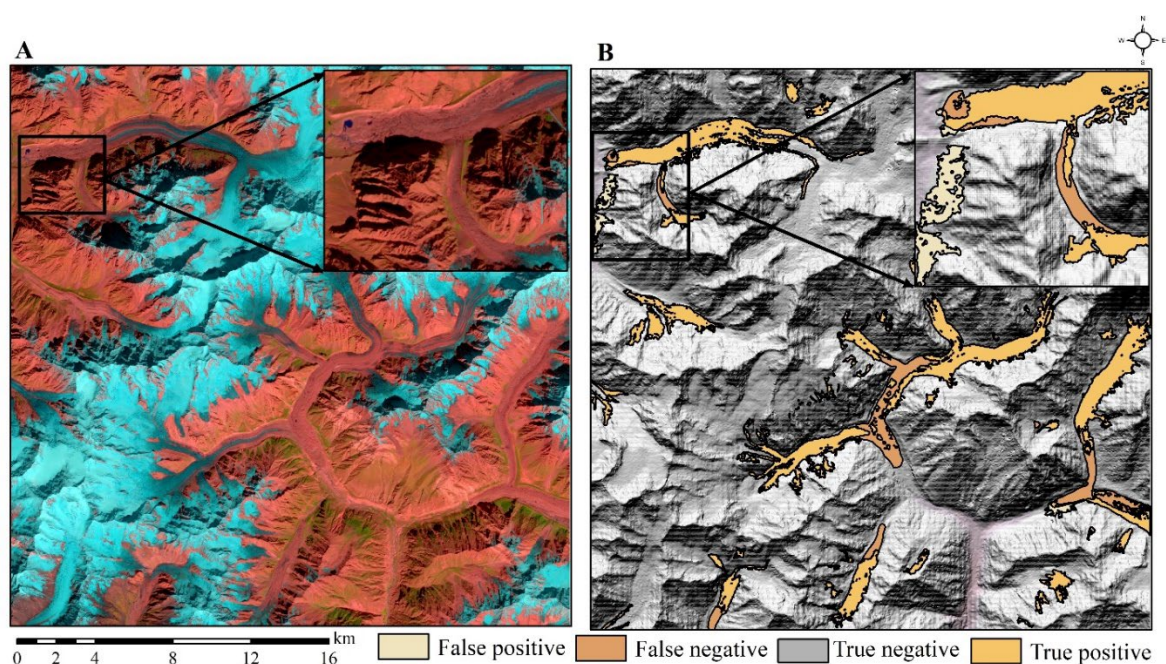

**Figure S2.** Impact of shadow on the classification accuracy of the proposed algorithm. A – presence of shadow in a satellite image, and B – classification of shadow as a false positive in the results obtained via the proposed algorithm.

**Table S1.** Data used in the present study.

| Eastern Himalaya |                                                                          |                       |
|------------------|--------------------------------------------------------------------------|-----------------------|
| Satellite        | Scene ID/Product ID                                                      | Spatial resolution(m) |
| Sentinel 1       | S1A_IW_SLC__1SDV_20200410T235453_20200410T235520_032072_03<br>B4CE_CFAF, | 2.3 × 14.1            |
|                  | S1A_IW_SLC__1SDV_20200422T235454_20200422T235521_032247_03<br>BAF0_6F7D, |                       |
|                  | S1A_IW_SLC__1SDV_20161115T000242_20161115T000312_013945_016<br>754_A572, |                       |
|                  | S1A_IW_SLC__1SDV_20170126T000239_20170126T000309_014995_018<br>7CF_8AD1, |                       |
| Sentinel 2       | L1C_T45RXL_A007609_20161206T044556,                                      | VNIR – 10             |
|                  | L1C_T45RXL_A008324_20170125T044345,                                      | SWIR - 20             |
|                  | L1C_T46RBR_A019793_20201220T044209,                                      | VNIR (B1 & B9) – SWIR |
|                  | L1C_T46RBS_A019793_20201220T044209,                                      | (B10) - 60            |
| Landsat 8        | LC81380402021003LGN00,                                                   | 30, 15 PAN            |
|                  | LC81380412021003LGN00,                                                   |                       |
|                  | LC81390412016365LGN01,                                                   |                       |
| ALOS DEM         | AP_13363_FBS_F3050_RT1,                                                  | 12.5                  |
|                  | AP_13363_FBS_F3060_RT1,                                                  |                       |
| Central Himalaya |                                                                          |                       |
| Sentinel 1       | S1A_IW_SLC__1SDV_20200402T001915_20200402T001942_031941_03B<br>02B_E470, | 2.3 × 14.1            |
|                  | S1A_IW_SLC__1SDV_20200508T001917_20200508T001944_032466_03<br>C281_2F01, |                       |
|                  | S1A_IW_SLC__1SDV_20200515T001102_20200515T001130_032568_03<br>C5AC_2086, |                       |

|                  |                                                                                                                                                                                                                                       |                                                               |
|------------------|---------------------------------------------------------------------------------------------------------------------------------------------------------------------------------------------------------------------------------------|---------------------------------------------------------------|
|                  | S1A_IW_SLC__1SDV_20200527T001103_20200527T001131_032743_03<br>CAFC_D764,<br>S1A_IW_SLC__1SDV_20200523T004312_20200523T004340_032685_03<br>C929_4E86,<br>S1A_IW_SLC__1SDV_20200511T004311_20200511T004339_032510_03<br>C3DB_65FC       |                                                               |
| Sentinel 2       | L1C_T45RTM_A019021_20201027T050433,<br>L1C_T45RTN_A019021_20201027T050433,<br>L1C_T45RVM_A028673_20201218T045213,<br>L1C_T45RVL_A028816_20201228T045214,<br>L1C_T45RWL_A028816_20201228T045214,<br>L1C_T45RWM_A028816_20201228T045214 | VNIR – 10<br>SWIR - 20<br>VNIR (B1 & B9) – SWIR<br>(B10) - 60 |
| Landsat 8        | LC81420402020301LGN00,<br>LC81400412021001LGN00,<br>LC81450382020274LGN00,<br>LC81450392020274LGN00                                                                                                                                   | 30, 15 PAN                                                    |
| ALOS DEM         | AP_05348_FBS_F0540_RT1,<br>AP_05348_FBS_F0550_RT1,<br>AP_07609_FBD_F0540_RT1,<br>AP_07609_FBD_F0550_RT1,<br>AP_08528_FBD_F0530_RT1,<br>AP_08149_FBD_F0600_RT1,<br>AP_08149_FBD_F0610_RT1,<br>AP_08572_FBD_F0600_RT1                   | 12.5                                                          |
| Western Himalaya |                                                                                                                                                                                                                                       |                                                               |
| Sentinel 1       | S1A_IW_SLC__1SDV_20200410T005051_20200410T005121_032058_03<br>B45C_F131,<br>S1A_IW_SLC__1SDV_20200422T005051_20200422T005121_032233_03<br>BA7B_370F                                                                                   | 2.3 × 14.1                                                    |
| Sentinel 2       | L1C_T43SFS_A018335_20200909T054842,<br>L1C_T43SFT_A018335_20200909T054842,                                                                                                                                                            | VNIR – 10<br>SWIR - 20<br>VNIR (B1 & B9) – SWIR<br>(B10) - 60 |
| Landsat 8        | LC81470372020288LGN00,<br>LC81480362020295LGN00,<br>LC81480372020279LGN00,<br>AP_07799_FBD_F0640_RT1,<br>AP_07799_FBD_F0650_RT1                                                                                                       | 30, 15 PAN                                                    |
| ALOS DEM         | AP_07799_FBD_F0660_RT1<br>AP_08222_FBD_F0640_RT1<br>AP_08222_FBD_F0650_RT1<br>AP_08222_FBD_F0660_RT1                                                                                                                                  | 12.5                                                          |
| Karakoram        |                                                                                                                                                                                                                                       |                                                               |
| Sentinel 1       | S1A_IW_SLC__1SDV_20200514T010617_20200514T010645_032554_03<br>C53D_0763,<br>S1A_IW_SLC__1SDV_20200526T010618_20200526T010646_032729_03<br>CA8B_2515                                                                                   |                                                               |
| Sentinel 2       | L1C_T43SCA_A018521_20200922T055400,<br>L1C_T43SDA_A018521_20200922T055400,                                                                                                                                                            | VNIR – 10<br>SWIR - 20<br>VNIR (B1 & B9) – SWIR<br>(B10) - 60 |

|           |                                                                                                                                                                                                                                                                                                      |            |
|-----------|------------------------------------------------------------------------------------------------------------------------------------------------------------------------------------------------------------------------------------------------------------------------------------------------------|------------|
| Landsat 8 | LC81500352018255LGN00                                                                                                                                                                                                                                                                                | 30, 15 PAN |
| ALOS DEM  | AP_05859_FBS_F0710_RT1,<br>AP_05859_FBS_F0720_RT1,<br>AP_05859_FBS_F0730_RT1,<br>AP_07799_FBD_F0710_RT1,<br>AP_07799_FBD_F0720_RT1,<br>AP_07799_FBD_F0730_RT1,<br>AP_08222_FBD_F0710_RT1,<br>AP_08222_FBD_F0720_RT1,<br>AP_12569_FBD_F0700_RT1,<br>AP_12569_FBD_F0700_RT1,<br>AP_12569_FBD_F0720_RT1 | 12.5       |

**Table S2.** Results of the various deep artificial neural network models used on the test data.

| Hidden Layers           | Activation Function | Optimizer | Learning Rate | Recall | Precision | F-Score |
|-------------------------|---------------------|-----------|---------------|--------|-----------|---------|
| 40-20-60                | Relu                | Adam      | 0.001         | 0.42   | 0.62      | 0.50    |
| 64-40-18                | Relu                | Adam      | 0.001         | 0.31   | 0.60      | 0.41    |
| 40-20-6                 | Relu                | RMSprop   | 0.001         | 0.36   | 0.56      | 0.43    |
| 40-20-6                 | Tanh                | Adam      | 0.001         | 0.70   | 0.68      | 0.69    |
| 40-20-5                 | Relu                | Adam      | 0.001         | 0.38   | 0.62      | 0.47    |
| 60-30-15                | Relu                | Adam      | 0.001         | 0.31   | 0.60      | 0.41    |
| 128-62-30               | Relu                | Adam      | 0.001         | 0.32   | 0.64      | 0.43    |
| 40-80-60                | Tanh                | Adam      | 0.001         | 0.47   | 0.66      | 0.55    |
| 128-64-32               | Tanh                | Adam      | 0.001         | 0.69   | 0.75      | 0.72    |
| 256-128-64-32           | Tanh                | Adam      | 0.001         | 0.75   | 0.77      | 0.76    |
| 512—256-128-64-32       | Tanh                | Adam      | 0.0001        | 0.75   | 0.79      | 0.77    |
| *1024-512—256-128-64-32 | Tanh                | Adam      | 0.0001        | 0.80   | 0.82      | 0.81    |

\* The final used model
